# Supplementary material for: Caffeic Acid Modulates Processes Associated with Intestinal Inflammation
Source: MDPI journal article supplement (doi:10.3390/nu13020554), 2021-02-08
Supplement: s1 [file s1]

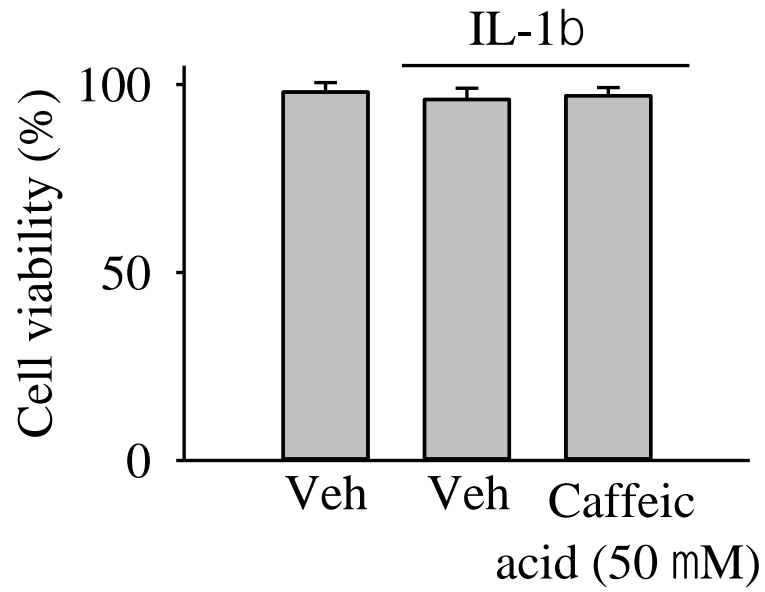

**Supplementary Figure 1.** Effect of caffeic acid and(or) 1ng/mL IL-1 $\beta$  on myofibroblasts of colon cell viability after 24 h of treatment. The results show the average  $\pm$  S.D. of viable cells (%) obtained from three independent experiments (n=3).
